# Supplementary material for: Association of adverse childhood experiences with the development of multiple sclerosis
Source: PubMed Central journal article supplement — J Neurol Neurosurg Psychiatry. 2022 Apr 4;93(6):645–50. doi: 10.1136/jnnp-2021-328700 (PMC9148981; doi:10.1136/jnnp-2021-328700), 2022-04-04
Supplement: jnnp-2021-328700supp001.pdf [file jnnp-2021-328700supp001.pdf]

## Supplemental material

**Supplementary figure 1:** Study design of the main analysis

**Supplementary figure 2:** Study design of the sensitivity analyses

**Supplementary table 1:** Hazard ratios of multiple sclerosis by type of childhood abuse: Excluding Women with First Clinical Symptom of MS Before Age 23 Years

**Supplementary table 2:** Hazard ratios of multiple sclerosis by type of childhood abuse: Including all women with MS in the MoBa-cohort

**Supplementary table 3:** Characteristics of participants with missing data compared to the study population

## Supplementary figure 1. Study Design of the Main Analysis

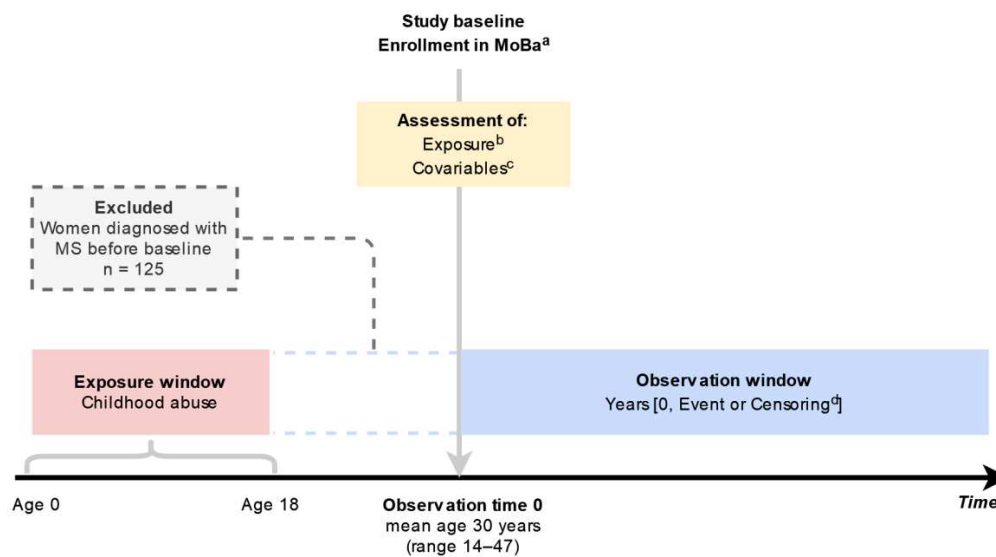

Abbreviations: MoBa = The Norwegian Mother, Father and Child cohort study; MS = Multiple sclerosis

<sup>a</sup> Enrollment in MoBa took place in pregnancy weeks 15–18

<sup>b</sup> Exposure (childhood abuse) was assessed through self-completed questionnaires in pregnancy week 30

<sup>c</sup> Covariables were assessed through self-completed questionnaires in pregnancy week 18 and through data-linkage with the Norwegian Medical Birth Registry

<sup>d</sup> End of follow-up was December 31, 2018

## Supplementary figure 2: Study Design of the Sensitivity Analyses

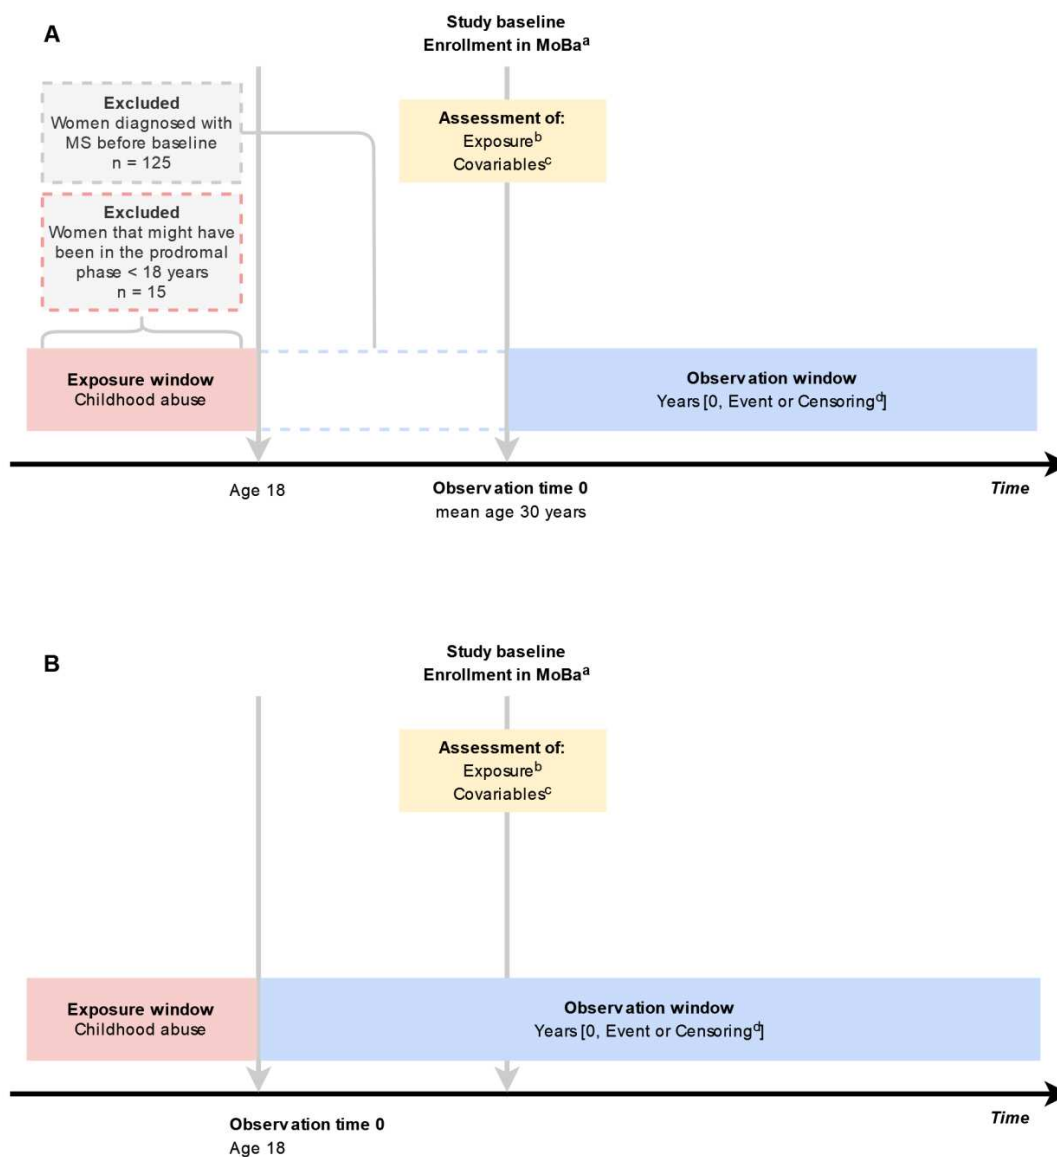

Abbreviations: MoBa = The Norwegian Mother, Father and Child cohort study; MS = Multiple sclerosis

A: Sensitivity analysis with exclusion of women that might have been in the prodromal phase of MS when exposed to abuse (< 18 years).

B: Sensitivity analysis with all women in MoBa with MS, both prevalent and incident diagnoses.

<sup>a</sup> Enrollment in MoBa took place in pregnancy weeks 15–18

<sup>b</sup> Exposure (childhood abuse) was assessed through self-completed questionnaires in pregnancy week 30

<sup>c</sup> Covariables were assessed through self-completed questionnaires in pregnancy week 18 and through data-linkage with the Norwegian Medical Birth Registry

<sup>d</sup> End of follow-up was December 31<sup>st</sup>, 2018

**Supplementary table 1. Hazard Ratios of Multiple Sclerosis by Type of Childhood Abuse: Excluding Women with First Clinical Symptom of MS Before Age 23 Years**

| Exposure                                | N (%)<br>Total cohort | N (%)<br>Women<br>with MS | HR <sup>a</sup>  | HR <sup>b</sup>  |
|-----------------------------------------|-----------------------|---------------------------|------------------|------------------|
| No childhood abuse: ref                 | 63 508 (81)           | 217 (76)                  | Ref              | Ref              |
| Any childhood abuse                     | 14 474 (19)           | 68 (24)                   | 1.39 (1.05–1.82) | 1.35 (1.02–1.79) |
| <b>Emotional abuse</b>                  | 10 699 (14)           | 53 (20)                   | 1.47 (1.08–1.98) | 1.40 (1.01–1.95) |
| <i>Emotional abuse:<br/>Humiliation</i> | 9412 (13)             | 46 (17)                   | 1.44 (1.05–1.99) | 1.42 (1.02–1.97) |
| <i>Emotional abuse: Threat</i>          | 3405 (5)              | 19 (8)                    | 1.62 (1.01–2.60) | 1.52 (0.93–2.47) |
| <b>Sexual abuse</b>                     | 5415 (8)              | 33 (13)                   | 1.80 (1.25–2.61) | 1.77 (1.22–2.57) |
| <b>Physical abuse</b>                   | 4287 (6)              | 22 (9)                    | 1.50 (0.97–2.34) | 1.41 (0.90–2.23) |

Abbreviations: MS= Multiple sclerosis; HR = Hazard ratio

Of the 300 women who developed MS during the follow-up period, 15 women had their first clinical symptom of MS up to the age of 22 years and were excluded in this sensitivity analysis.

<sup>a</sup> Hazard ratios adjusted for school dropout ( $\leq 9$  years elementary school). Birth year was included as a stratification factor in the Cox model.

<sup>b</sup> Hazard ratios adjusted for adverse socioeconomic factors ( $\leq 9$  years elementary school, single mother or low household income), smoking (ever vs. never) and  $\text{BMI} \geq 25$  before study baseline). Birth year was included as a stratification factor in the Cox model. No other covariable violated the proportional hazard assumption.

**Supplementary table 2. Hazard Ratios of Multiple Sclerosis by Type of Childhood Abuse: Including All Women with MS in the MoBa Study**

| Exposure                                | N (%)<br>Total cohort | N (%)<br>Women<br>with MS | HR <sup>a</sup>  | HR <sup>b</sup>  |
|-----------------------------------------|-----------------------|---------------------------|------------------|------------------|
| No childhood abuse: ref                 | 63 596 (81)           | 306 (77)                  | Ref              | Ref              |
| Any childhood abuse                     | 14 497 (19)           | 91 (23)                   | 1.33 (1.05–1.68) | 1.29 (1.02–1.65) |
| <b>Emotional abuse</b>                  | 10 717 (14)           | 71 (19)                   | 1.40 (1.08–1.82) | 1.37 (1.05–1.79) |
| <i>Emotional abuse:<br/>Humiliation</i> | 9426 (13)             | 60 (16)                   | 1.34 (1.01–1.77) | 1.32 (0.99–1.75) |
| <i>Emotional abuse: Threat</i>          | 3412 (5)              | 26 (8)                    | 1.64 (1.10–2.46) | 1.49 (0.98–2.27) |
| <b>Sexual abuse</b>                     | 5421 (8)              | 39 (11)                   | 1.55 (1.11–2.17) | 1.46 (1.04–2.06) |
| <b>Physical abuse</b>                   | 4293 (6)              | 28 (8)                    | 1.40 (0.95–2.06) | 1.32 (0.88–1.96) |

Abbreviations: MS= Multiple sclerosis; MoBa = The Norwegian Mother, Father and Child cohort study; HR = Hazard ratio  
Sensitivity analysis with all the women with MS in the MoBa-study. Observation time calculated from age 18 years to event.  
Of the 125 women with current MS diagnosis at the time of enrollment in MoBa, 91 were eligible to be included in the cox regression analyses.

<sup>a</sup> Hazard ratios adjusted for school dropout ( $\leq 9$  years elementary school) and stratified by birthyear

<sup>b</sup> Hazard ratios adjusted for adverse socioeconomic factors ( $\leq 9$  years elementary school, single mother or low household income), smoking (ever vs. never) and BMI  $\geq 25$  before study baseline) and stratified by birthyear

### Supplementary table 3. Characteristics of Participants with Missing Data Compared to the Study Population

|                                                                    | Non-responders Q3 <sup>a</sup><br>n = 7633 | Missing abuse items <sup>b</sup><br>n = 617 | Study population<br>n = 77 997 |
|--------------------------------------------------------------------|--------------------------------------------|---------------------------------------------|--------------------------------|
| <b>Age at study baseline<sup>c</sup>; mean (SD)</b>                | 30 (5)                                     | 30 (5)                                      | 30 (5)                         |
| Missing; n (%)                                                     | -                                          | -                                           | 1 (< 1)                        |
| <b>Adverse socioeconomic status<sup>d</sup>; n (%)</b>             | 1368 (11)                                  | 147 (24)                                    | 8137 (10)                      |
| Missing; n (%)                                                     | 11 (< 1)                                   | 43 (7)                                      | 873 (1)                        |
| Low household income; n (%)                                        | 847 (11)                                   | 88 (14)                                     | 5520 (7)                       |
| Maternal short education; n (%)                                    | 369 (5)                                    | 60 (10)                                     | 1551 (2)                       |
| Single mother; n (%)                                               | 367 (5)                                    | 32 (5)                                      | 1774 (2)                       |
| <b>Ever smoker; n (%)</b>                                          | 4241 (56)                                  | 294 (48)                                    | 39 533 (51)                    |
| Missing; n (%)                                                     | 83 (1)                                     | 44 (7)                                      | 1140 (2)                       |
| <b>BMI <math>\geq</math> 25; n (%)</b>                             | 2290 (30)                                  | 145 (24)                                    | 23 681 (30)                    |
| Missing; n (%)                                                     | 326 (4)                                    | 78 (13)                                     | 2701 (4)                       |
| <b>Depression at study baseline (pregnancy)<sup>e</sup>; n (%)</b> | n/a                                        | 49 (8)                                      | 7305 (9)                       |
| Missing; n (%)                                                     | n/a                                        | 31 (54)                                     | 552 (< 1)                      |

Abbreviations: SD = Standard deviation; BMI = Body Mass Index; Q = Questionnaire

<sup>a</sup> 7633 women who responded to the first questionnaire in pregnancy week 18 did not respond to the questionnaire in pregnancy week 30 (Q3)

<sup>b</sup> 617 women responded to Q3, but did not complete the abuse-items

<sup>c</sup> Study baseline is the year of enrollment in the MoBa-study

<sup>d</sup> Low household income (< 60% of median income in the given year of study baseline), being a single mother, or completed  $\leq$  9 years of school.

<sup>e</sup> Depression was measured by a validated short version of the Hopkins Symptom Checklist in pregnancy week 30. Not available for those who did not respond to Q3.
